# Supplementary material for: FOXM1 and STAT3 interaction confers radioresistance in glioblastoma cells
Source: PubMed Central journal article supplement (PMC5340228; doi:10.18632/oncotarget.12670), 2016-10-14
Supplement: oncotarget-07-77365-s001.pdf [file oncotarget-07-77365-s001.pdf]

# FOXM1 and STAT3 interaction confers radioresistance in glioblastoma cells

## SUPPLEMENTARY MATERIALS AND METHODS

### Co-immunoprecipitation assay

U251 cells were treated with 4Gy RT for 24 hrs and cell lysates were prepared in RIPA lysis buffer (9.1 mM NaH<sub>2</sub>PO<sub>4</sub>, 1.7 mM Na<sub>2</sub>HPO<sub>4</sub>, 150 mM NaCl, pH 7.4, 0.5% sodium deoxycholate, 1% Nonidet P-40, and 0.1% SDS, protease inhibitor cocktail). 100 µg of total protein was incubated with STAT3 or FOXM1 antibody overnight at 4°C under constant rotation and 40ul protein A/G-agarose beads (#sc-2003, Santa Cruz., TX) were added to the mixture and incubated for 2-3 hrs at 4°C. The entire reaction mixture was gently washed three times with PBS with 0.1% tween-20 to remove the unbound proteins and the beads were resuspended in Laemmli solution and boiled for 5 min, resolved by SDS-PAGE, transferred to nitrocellulose membranes and probed overnight at 4°C with antibodies directed against FOXM1 or STAT3 and developed with chemiluminiscent reagent (Thermo Scientific., IL).

### PIPs database; evidence of interaction between STAT3 and FOXM1

PIPs is a database (<http://www.compbio.dundee.ac.uk/www-pips>) of predicted human protein-protein interactions [20]. The predictions have been made using a naïve Bayesian classifier to calculate a Score of interaction. It contains predictions of >37,000 high probability interactions of which >34,000 are not reported in the interaction databases HPRD, BIND, DIP or OPHID. The probability of interaction between two proteins is calculated by combining different features including: expression, orthology, domain co-occurrence, post-translational modifications and sub-cellular location. The predictions also take account of the topology of the predicted interaction

network. Score  $\geq 1$  indicating that the interaction is more likely to occur than not to occur. We compared interaction score between FOXM1 and STAT family members.

### Homologous recombination (HR) repair assay using DR-GFP plasmid

This assay was performed as described elsewhere [46]. U251 cells were stably transfected with Lipofectamine as recommended by the manufacturer (Invitrogen) with 2 µg of circular pDR-GFP (Plasmid 26475., AddGene., USA), stable Puromycin-resistant colonies were selected with 2 to 6 µg/mL puromycin (cat: ant-pr-1., InvivoGen., USA). Selected U251-DR-GFP cells were maintained in DMEM medium supplemented with 10% fetal bovine serum (Invitrogen). The recombination assay relies on the two inactivated tandem repeated (DR)-GFP plasmid developed by M. Jasin [47].

### Treatments

U251-DR-GFP cells (0.5 million in 60mm dishes) were treated with siomycin-A, 4 hours post transfection with 2ug I-SceI plasmid (pCBASceI) or mock. For siRNA mediated FOXM1 knock down, U251-DR-GFP cells were transfected with siRNA 24 hours prior to I-SceI transfection. Analysis was carried out 48 hours after I-SceI +/- transfection.

### GFP analysis

GFP flow cytometry was performed on live cells by Fluorescence Flow cytometer (BD FACS caliber). Flow data was analysed using Flowing Software (<http://www.flowingsoftware.com/>).

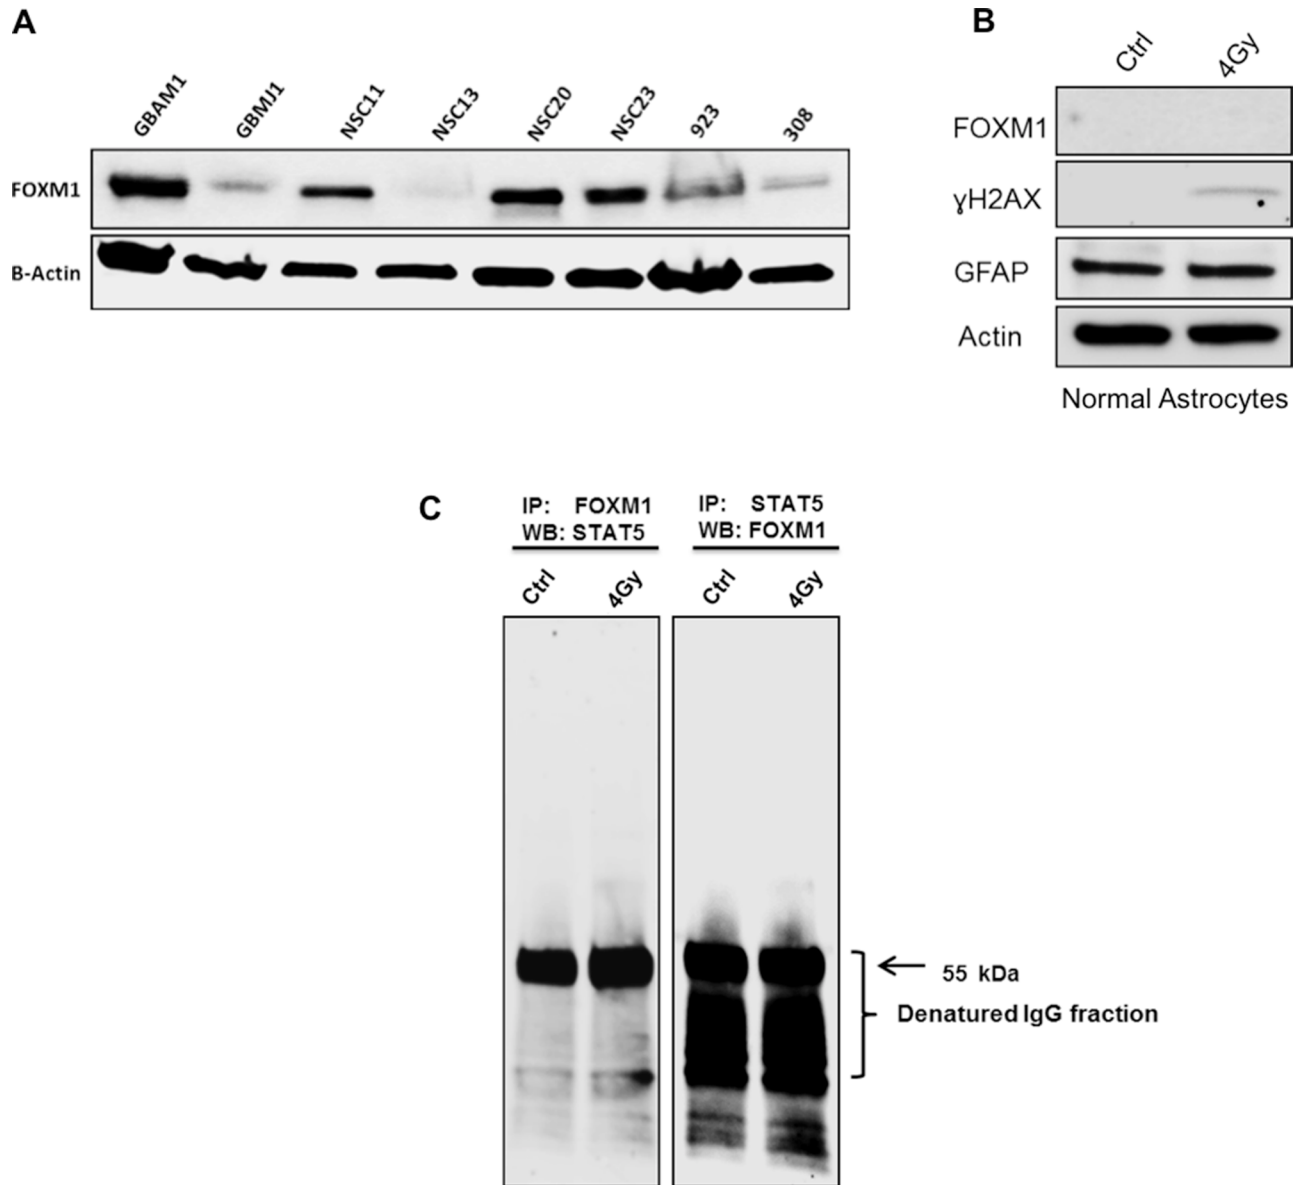

**Supplementary Figure S1: FOXM1 expression in patient derived GBM stem cells and normal astrocytes.** Panel **A**. represents immunoblot for FOXM1 in various patient derived GBM stem cells and panel **B**. represent immunoblot for FOXM1 in cultured normal astrocytes. Panel **C**. represent the co-immunoprecipitation immunoblots for FOXM1 and STAT5 interaction. Data presented are representative from at least three independent experiments.

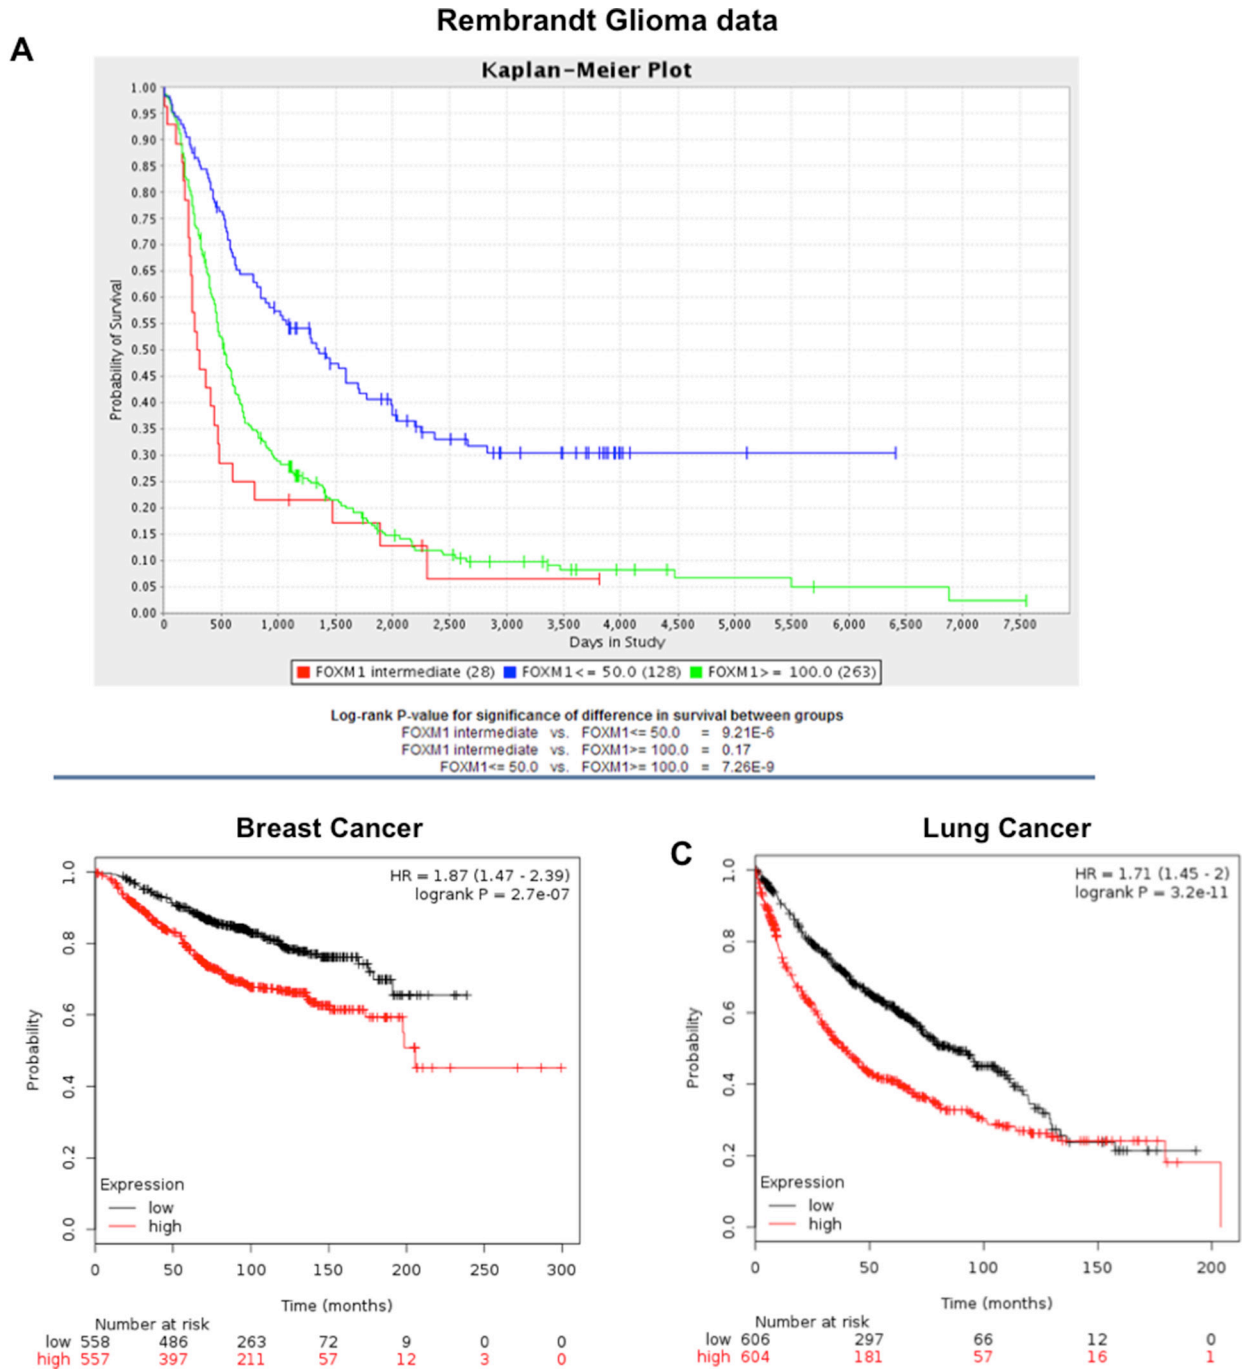

**Supplementary Figure S2: Low levels of FOXM1 confers survival advantage in GBM, Breast and Lung cancer patients**  
**Panel A.** FOXM1 expression levels were correlated to GBM patient survival as Kaplan-Meier plot by curating publicly available datasets derived from REpository for Molecular BRAin Neoplasia DaTa (REMBRANDT) (<http://rembrandt.nci.nih.gov>), for all gliomas. The green line shows the survival of all glioma patients with intermediary FOXM1 expression. The red line shows the survival of FOXM1 over-expressing gliomas. While the Blue symbol show the patients that survived with a low expression of FOXM1. Kaplan-Meier plot survival analysis was carried out on data from individuals with breast panel **B.** or lung cancer panel **C.** using KM-Plotter ([www.kmplot.com](http://www.kmplot.com)). This tool uses data from Gene Expression Omnibus (GEO, Affymetrix HGU133A and HGU133+2 microarrays), The European Genome-phenome Archive (EGA) and TCGA.

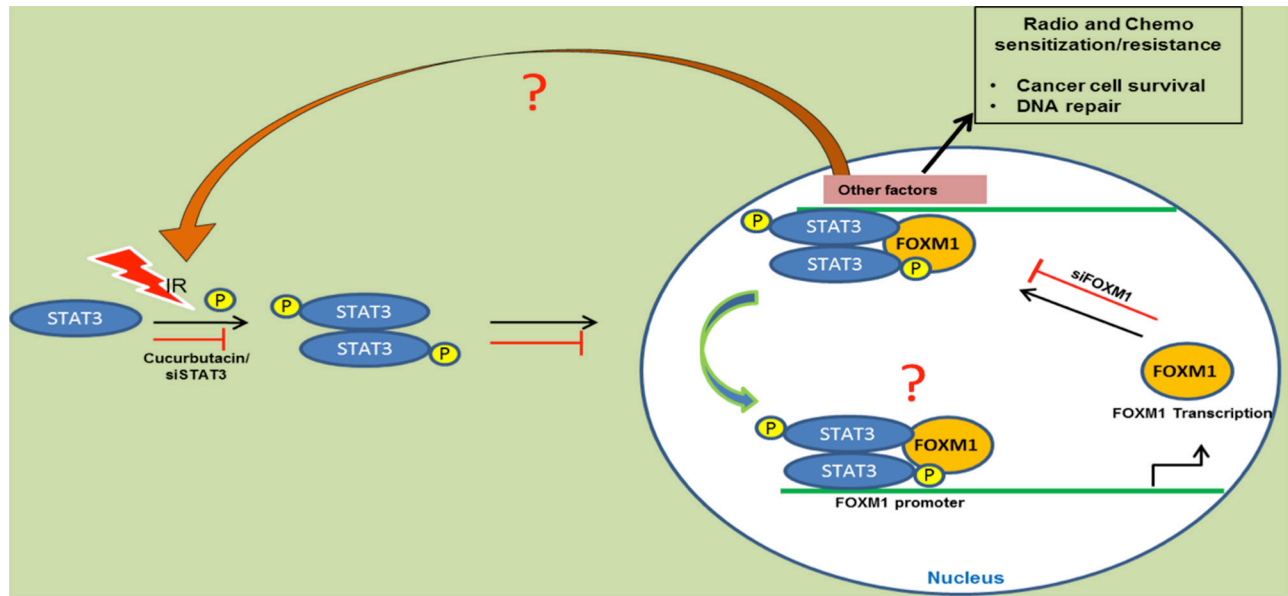

**Supplementary Figure S3: Illustrative image. Predicted co-regulatory positive feedback loop mechanism between FOXM1 expression and STAT3 activation.** We hypothesize FOXM1 and STAT3 interact and co-regulate their expression(FOXM1) and activation (pSTAT3). Further this interaction (FOXM1/pSTAT3) might regulate radio resistance in GBM cells.
